# Supplementary material
Source: publisher figshare collection journal article supplement (https://acs.figshare.com/ndownloader/files/3608922)
Supplement: Supplementary file 1 [file 3608922]

SUPPORTING INFORMATION

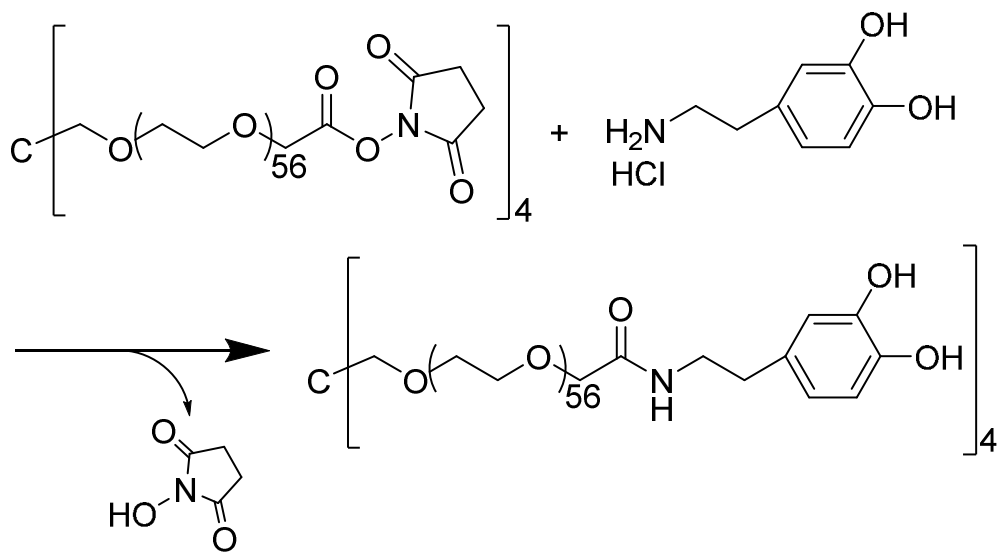

**Scheme S1.** Synthesis scheme of PEG-D.

<sup>1</sup>H-NMR (400 MHz, d<sub>6</sub>-DMSO)

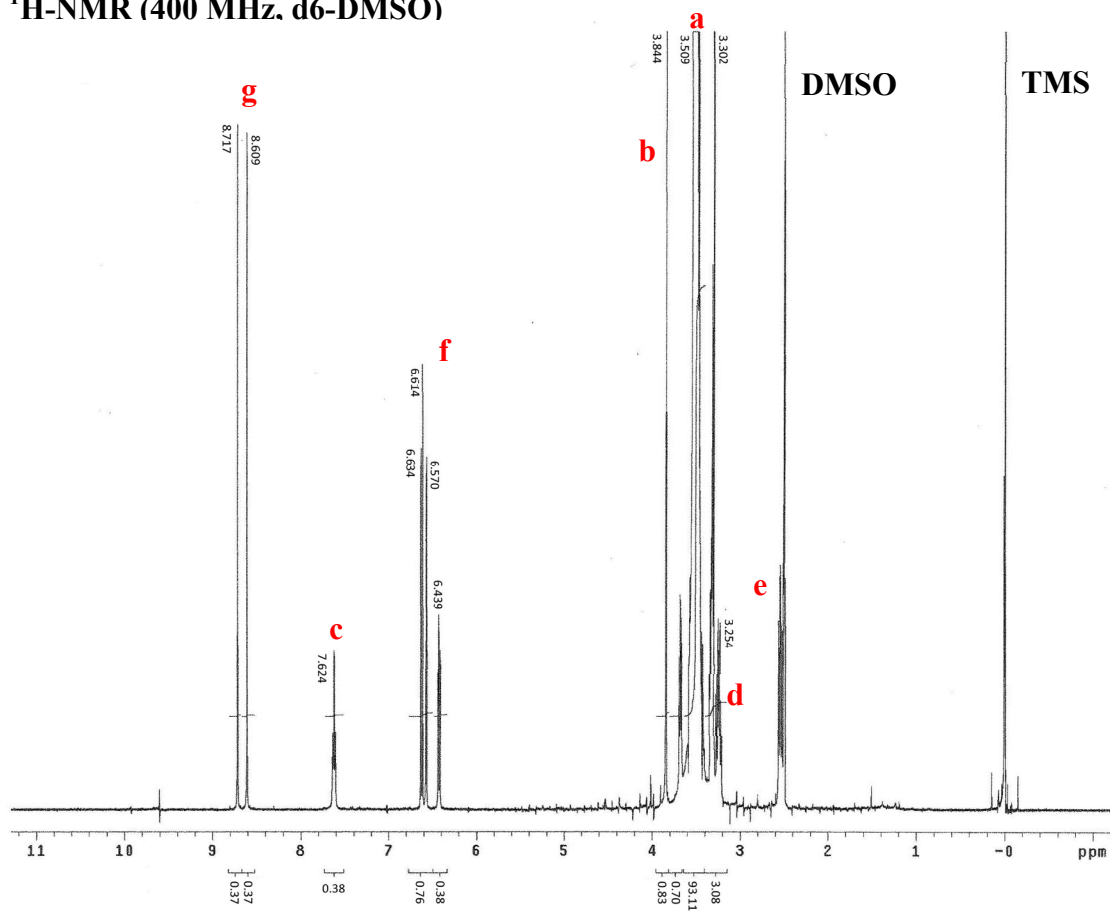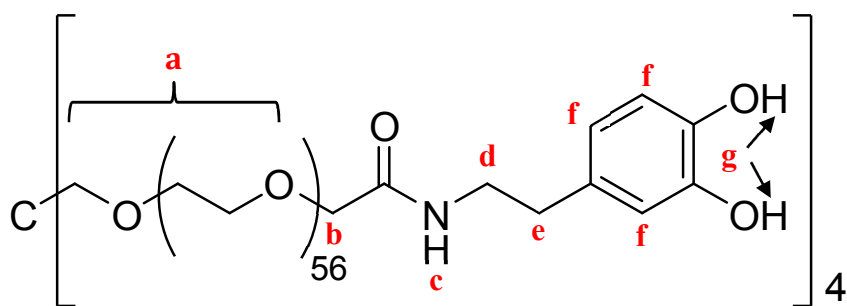

**Figure S1.** <sup>1</sup>H NMR of PEG-D performed in d<sub>6</sub>-DMSO with the peaks labeled with corresponding protons.

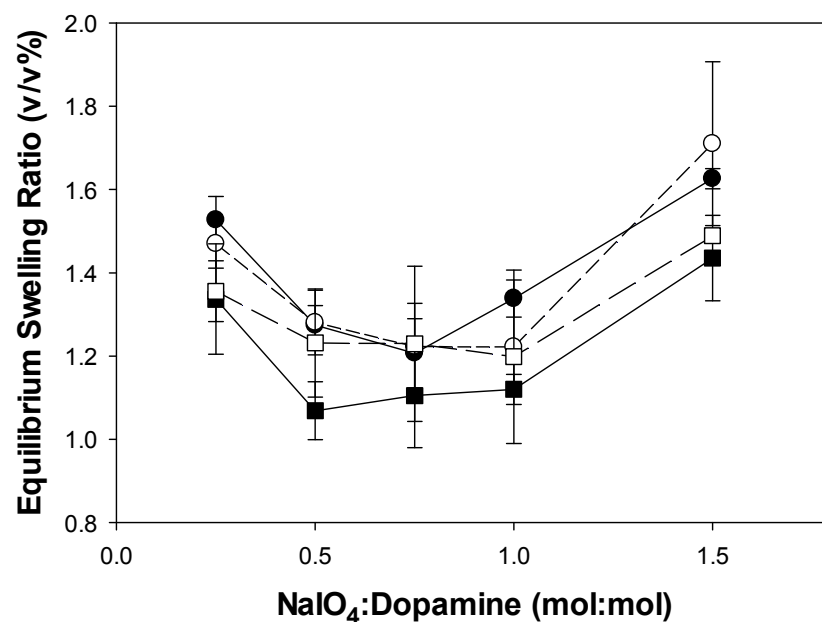

**Figure S2.** Equilibrium swelling ratio as a function of NaIO<sub>4</sub>:dopamine molar ratio for hydrogels formulated with precursor solutions adjusted to a pH of 5.7 (●), 6.7 (○), 7.4 (■), and 8.0 (□).

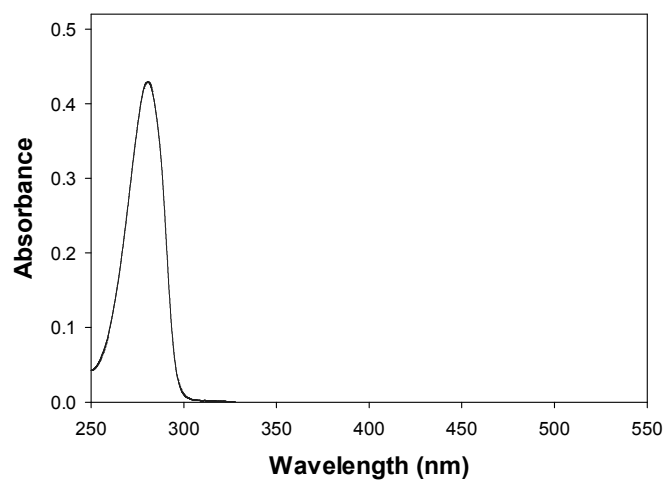

**Figure S3.** UV-vis spectrum of 50  $\mu$ M PEG-D (200  $\mu$ M dopamine) in 10 mM sodium phosphate buffered at pH 5.7.

**Table S1.** Polymer volume fraction ( $v_r$ ) in the relaxed PEG-D hydrogel using a 0.5 IO<sub>4</sub>:dopamine molar ratio (n = 3 each)\*

| pH              | $v_r$                 |
|-----------------|-----------------------|
| 5.7             | $0.0687 \pm 0.000333$ |
| 6.7             | $0.0676 \pm 0.000614$ |
| 7.4             | $0.0679 \pm 0.00117$  |
| 8.0             | $0.0677 \pm 0.00111$  |
| Overall Average | $0.0680 \pm 0.000885$ |

\* There was no statistical difference between groups and the coefficient of variance for all test groups were lower than 1.7%. As such, the average value of these 12 samples was used in calculation of the molecular weight between cross-links and the equilibrium swelling ratio.

**Table S2.** Adhesive properties of PEG-D and commercial CoSeal tested at pH 7.4

|                                      | PEG-D*         |               | CoSeal^         |
|--------------------------------------|----------------|---------------|-----------------|
|                                      | 1 hr           | overnight     |                 |
| Adhesive Strength (kPa)              | $3.3 \pm 0.52$ | $7.8 \pm 1.7$ | $0.63 \pm 0.19$ |
| Work of Adhesion (J/m <sup>2</sup> ) | $4.8 \pm 1.0$  | $15 \pm 2.0$  | $1.5 \pm 0.65$  |

\* Tested after incubation for either 1 hr or overnight

^ Tested after incubation for overnight

**Table S3.** Results of MTT cell viability assay for extract of PEG-D cured using a NaIO<sub>4</sub>:dopamine molar ratio of 0.5.

| pH  | Cell Viability   |
|-----|------------------|
| 5.7 | $100\% \pm 16\%$ |
| 6.7 | $110\% \pm 12\%$ |
| 7.4 | $98\% \pm 4.0\%$ |
| 8.0 | $99\% \pm 10\%$  |
